# Supplementary material
Source: ML conference proceedings conference paper supplement (https://proceedings.mlr.press/v139/nietert21a.html)
Supplement: Supplementary file 1 [file nietert21a-supp.pdf]

## Appendix

### A.0. Additional Notation

For a given probability measure  $\mu \in \mathcal{P}$ , let  $\Phi_\mu(t) := \mathbb{E}[e^{i\langle t, X \rangle}]$  with  $X \sim \mu$  denote its characteristic function. Let  $C^k(\mathbb{R}^d)$  denote the class of  $k$ -times continuously differentiable functions on  $\mathbb{R}^d$ . Let  $\mathcal{L}(X)$  denote the law of a random variable  $X$ . We write  $\lesssim$  for inequalities up to some numerical constant.

### A.1. Proofs for Section 3

We first prove the following lemmas.

**Lemma 2** (General smooth metrics). *Let  $\kappa \in \mathcal{P}$  be a distribution whose characteristic function never vanishes. If  $d$  is a metric on  $\mathcal{X} \subset \mathcal{P}$  and  $\mathcal{X}$  is closed under taking convolutions with  $\kappa$ , then  $d_\kappa : (\mu, \nu) \mapsto d(\mu * \kappa, \nu * \kappa)$  is also a metric on  $\mathcal{X}$ .*

*Proof.* Non-negativity and symmetry follow from definition. The triangle inequality is also straightforward, since for  $\mu_1, \mu_2, \mu_3 \in \mathcal{X}$ , the triangle inequality for  $d$  gives

$$\begin{aligned} d_\kappa(\mu_1, \mu_2) &= d(\mu_1 * \kappa, \mu_2 * \kappa) \\ &\leq d(\mu_1 * \kappa, \mu_3 * \kappa) + d(\mu_3 * \kappa, \mu_2 * \kappa) \\ &= d_\kappa(\mu_1, \mu_3) + d_\kappa(\mu_3, \mu_2). \end{aligned}$$

Finally, if  $d_\kappa(\mu, \nu) = 0$ , then  $\mu * \kappa = \nu * \kappa$ . Recalling that the characteristic function of a convolution of measures factors into a product, i.e.,  $\Phi_{\mu_1 * \mu_2} = \Phi_{\mu_1} \Phi_{\mu_2}$ , and since the characteristic function of  $\kappa$  never vanishes, we have  $\mu = \nu$ .  $\square$

**Lemma 3** (Contractive property of convolution). *For any probability measure  $\kappa \in \mathcal{P}$ ,  $W_p(\mu * \kappa, \nu * \kappa) \leq W_p(\mu, \nu)$ . In particular,  $W_p^{(\sigma)}(\mu, \nu) \leq W_p(\mu, \nu)$ .*

*Proof.* Let  $(X, Y)$  be an optimal coupling for  $W_p(\mu, \nu)$ . Then taking  $Z \sim \kappa$  independently,

$$\begin{aligned} W_p(\mu * \kappa, \nu * \kappa)^p &\leq \mathbb{E}[|(X + Z) - (Y + Z)|^p] \\ &= \mathbb{E}[|X - Y|^p] = W_p(\mu, \nu)^p. \quad \square \end{aligned}$$

**Lemma 4** (Coupling decomposition). *If  $\pi \in \Pi(\mu * \mathcal{N}_\sigma, \nu * \mathcal{N}_\sigma)$ , then there exists a coupling  $(X, Y, Z, Z')$  such that  $(X, Z) \sim \mu \otimes \mathcal{N}_\sigma$ ,  $(Y, Z') \sim \nu \otimes \mathcal{N}_\sigma$ , and  $(X + Z, Y + Z') \sim \pi$ .*

*Proof.* It suffices to find a coupling  $(X + Z, Y + Z', Z, Z')$  with the correct marginals. First, note that we already have couplings  $(X + Z, Y + Z')$ ,  $(X + Z, Z)$  and  $(Y + Z', Z')$ , given by  $\pi$ ,  $(\mu * \mathcal{N}_\sigma) \otimes \mathcal{N}_\sigma$ , and  $(\nu * \mathcal{N}_\sigma) \otimes \mathcal{N}_\sigma$ , respectively. Hence, we can apply the gluing lemma (see, e.g., (Villani,

2003)) between  $\pi$  and  $(\mu * \mathcal{N}_\sigma) \otimes \mathcal{N}_\sigma$  to obtain a coupling  $(X + Z, Y + Z', Z)$  and then between  $\pi$ ,  $(\nu * \mathcal{N}_\sigma) \otimes \mathcal{N}_\sigma$  to obtain a coupling  $(X + Z, Y + Z', Z')$ . We apply the gluing lemma a final time between the outcomes of its previous applications to obtain a coupling  $(X + Z, Y + Z', Z, Z')$ .  $\square$

#### A.1.1. Proof of Proposition 1

Lemma 2 verifies that  $W_p^{(\sigma)}$  is a metric on  $\mathcal{P}_p$ , since  $\Phi_{\mathcal{N}_\sigma}(t) = e^{-\sigma^2|t|^2/2} \neq 0$ , for all  $t \in \mathbb{R}^d$ . To show that  $W_p^{(\sigma)}$  induces the same topology as  $W_p$ , it suffices to prove that

$$W_p(\mu_n, \mu) \rightarrow 0 \iff W_p^{(\sigma)}(\mu_n, \mu) \rightarrow 0.$$

The “ $\Rightarrow$ ” direction follows by Lemma 3. For the other direction, suppose that  $W_p^{(\sigma)}(\mu_n, \mu) \rightarrow 0$ . By Lemma 4, we can find a coupling  $((X_n, Z_n), (X, Z))$  with  $(X_n, Z_n) \sim \mu_n \otimes \mathcal{N}_\sigma$  and  $(X, Z) \sim \mu \otimes \mathcal{N}_\sigma$  such that  $W_p^{(\sigma)}(\mu_n, \mu)^p = \mathbb{E}[|X_n + Z_n - (X + Z)|^p]$ . We will show that  $X_n \xrightarrow{d} X$  and  $\mathbb{E}[|X_n|^p] \rightarrow \mathbb{E}[|X|^p]$ , which yields the desired result.

To that end, it is sufficient (and necessary) to show that  $X_n \xrightarrow{d} X$  and that  $|X_n|^p$  is uniformly integrable. Since convergence in distribution is equivalent to pointwise convergence of characteristic functions, from  $X_n + Z_n \xrightarrow{d} X + Z$ , we have for all  $t \in \mathbb{R}^d$  that

$$\begin{aligned} \lim_{n \rightarrow \infty} \Phi_{\mu_n}(t) e^{-\sigma^2|t|^2/2} &= \lim_{n \rightarrow \infty} \Phi_{\mu_n * \mathcal{N}_\sigma}(t) \\ &= \Phi_{\mu * \mathcal{N}_\sigma}(t) = \Phi_\mu(t) e^{-\sigma^2|t|^2/2}, \end{aligned}$$

implying that  $\lim_{n \rightarrow \infty} \Phi_{\mu_n}(t) = \Phi_\mu(t)$ , for all  $t \in \mathbb{R}^d$ , and hence that  $X_n \xrightarrow{d} X$ . To verify the uniform integrability, observe that  $|X_n|^p \leq 2^{p-1}(|X_n + Z_n|^p + |Z_n|^p)$ . By construction,  $|X_n + Z_n|^p$  is uniformly integrable, while  $|Z_n|^p \stackrel{d}{=} |Z|^p$  is trivially uniformly integrable, implying the uniform integrability of their sum and hence  $|X_n|^p$ .  $\square$

#### A.1.2. Proof of Lemma 1

By Lemma 3, we have  $W_p^{(\sigma_2)}(\mu, \nu) \leq W_p^{(\sigma_1)}(\mu, \nu)$ . For the other direction, let  $X \sim \mu, Y \sim \nu, Z_X \sim \mathcal{N}_{\sigma_1}, Z_Y \sim \mathcal{N}_{\sigma_1}, Z'_X \sim \mathcal{N}_{\sqrt{\sigma_2^2 - \sigma_1^2}}$ , and  $Z'_Y \sim \mathcal{N}_{\sqrt{\sigma_2^2 - \sigma_1^2}}$ . The smooth  $p$ -Wasserstein distance of parameter  $\sigma_2$  is given as a minimization over couplings of the aforementioned random variables subject to the mutual independence of  $(X, Z_X, Z'_X)$  along with that of  $(Y, Z_Y, Z'_Y)$ . With this convention, we have

$$\begin{aligned} &W_p^{(\sigma_2)}(\mu, \nu) \\ &= \inf \left( \mathbb{E} \left[ |((X + Z_X) - (Y + Z_Y)) + (Z'_X - Z'_Y)|^p \right] \right)^{1/p}. \end{aligned}$$

Now, Minkoski's inequality gives

$$\begin{aligned} W_p^{(\sigma_2)}(\mu, \nu) &\geq \inf \left[ \left( \mathbb{E} \left[ |(X + Z_X) - (Y + Z_Y)|^p \right] \right)^{1/p} \right. \\ &\quad \left. - \left( \mathbb{E} \left[ |Z'_X - Z'_Y|^p \right] \right)^{1/p} \right] \\ &\geq W_p^{(\sigma_1)}(\mu, \nu) - \sup \left( \mathbb{E} \left[ |Z'_X - Z'_Y|^p \right] \right)^{1/p} \\ &\geq W_p^{(\sigma_1)}(\mu, \nu) - 2 \left( \mathbb{E} \left[ |Z'_X|^p \right] \right)^{1/p}. \end{aligned}$$

Recall that for  $Z \sim \mathcal{N}(0, I_d)$ ,

$$\mathbb{E} [|Z|^p] = \frac{2^{p/2} \Gamma((p+d)/2)}{\Gamma(d/2)}.$$

If  $p$  is even, then above term is bounded by  $(d+2p-2)^{p/2}$ . In general, we round  $p$  up to the nearest even integer to obtain the bound  $(d+2p+2)^{p/2}$ , completing the proof.  $\square$

### A.1.3. Proof of Corollary 1

The proof follows that of Theorem 3 in (Goldfeld & Greenwald, 2020). For Claim (ii), we simply apply Lemma 1, taking  $\sigma_1 = 0$  and  $\sigma_2 \rightarrow 0$ . For Claim (i), monotonicity follows directly from the contractive property established in the previous proof. For left continuity of  $W_p^{(\sigma)}$ , we apply Lemma 1 with  $\sigma_2 = \sigma$  and  $\sigma_1 \nearrow \sigma$ . For right continuity, take  $\sigma_k \searrow \sigma$  and define  $\varepsilon_k = \sqrt{\sigma_k^2 - \sigma^2}$ . Then,

$$W_p^{(\sigma_k)}(\mu, \nu) = W_p^{(\varepsilon_k)}(\mu * \mathcal{N}_\sigma, \nu * \mathcal{N}_\sigma) \rightarrow W_p^{(\sigma)}(\mu, \nu)$$

as  $k \rightarrow \infty$ . Claim (iii) follows from Corollary 2.4 of (Chen & Niles-Weed, 2020).  $\square$

### A.1.4. Proof of Proposition 2

A close inspection of the proof of Theorem 4 in (Goldfeld & Greenwald, 2020), which covers the  $p = 1$  case up to extraction of a subsequence, reveals that the only required properties of  $|\cdot|^p$  are its non-negativity and continuity. These also hold for  $|\cdot|^p$ , so the theorem applies to  $W_p^{(\sigma)}$ . Further, the proof implies that any weakly convergent subsequence of couplings converges to an optimal coupling for  $W_p^{(\sigma)}(\mu, \nu)$ . Since for  $p > 1$  optimal couplings are unique (see, e.g., Theorem 2.44 of (Villani, 2003)), Prokhorov's Theorem implies that extraction of a subsequence is not necessary.  $\square$

### A.1.5. Proof of Theorem 1

We begin with a useful result bounding unsmoothed  $W_p$  by a dual Sobolev norm, adapting a proof from (Dolbeault et al., 2009).

**Lemma 5.** Fix  $p > 1$  and suppose that  $\mu_0, \mu_1 \in \mathcal{P}_p$  with  $\mu_0, \mu_1 \ll \gamma$  for some locally finite Borel measure  $\gamma$  on  $\mathbb{R}^d$ .

Denote their respective densities by  $f_i = d\mu_i/d\gamma$ . If  $f_0$  or  $f_1$  is lower bounded by some  $c > 0$ , then we have

$$W_p(\mu_0, \mu_1) \leq p c^{-1/q} \|\mu_0 - \mu_1\|_{\dot{H}^{-1,p}(\gamma)}.$$

*Proof.* We essentially apply Theorem 5.26 of (Dolbeault et al., 2009), which (for the choice of  $\phi(\rho, w) = \rho^{1-p}|w|^p$ ), bounds  $W_p$  from above by the relevant dual Sobolev norm times a constant which depends on a lower bound for both  $f_0$  and  $f_1$ . The proof exploits the dynamic Benamou-Brenier formulation of optimal transport and the path in  $(\mathcal{P}_p, W_p)$  which interpolates linearly between densities. Before concluding, they show

$$W_p(\mu_0, \mu_1)^p \leq \int_0^1 \int_{\mathbb{R}^d} ((1-t)f_0 + tf_1)^{1-p} |w|^p d\gamma dt,$$

where  $\|w\|_{L_p(\gamma; \mathbb{R}^d)} = \|\mu_0 - \mu_1\|_{\dot{H}^{-1,p}(\gamma)}$  (such  $w$  is shown to exist only assuming  $\|\mu_0 - \mu_1\|_{\dot{H}^{-1,p}(\gamma)} < \infty$ ). However, even with the lower bound  $c$  on just one of the densities (say  $f_0$  without loss of generality), we have

$$\begin{aligned} &\int_0^1 \int_{\mathbb{R}^d} ((1-t)f_0 + tf_1)^{1-p} |w|^p d\gamma dt \\ &\leq \int_0^1 (tc)^{1-p} \int_{\mathbb{R}^d} |w|^p d\gamma dt \\ &= c^{1-p} \|w\|_{L_p(\gamma; \mathbb{R}^d)}^p \int_0^1 t^{1-p} dt \\ &= p^p c^{1-p} \|\mu_0 - \mu_1\|_{\dot{H}^{-1,p}(\gamma)}^p, \end{aligned}$$

which gives the lemma.  $\square$

To prove the theorem, we apply the lemma with  $\mu_0 = \mu * \mathcal{N}_\sigma$ ,  $\mu_1 = \nu * \mathcal{N}_\sigma$ , and  $\gamma = \mathcal{N}_\sigma$ . To bound  $d\mu * \mathcal{N}_\sigma / d\mathcal{N}_\sigma$  from below, let  $X \sim \mu$  and compute

$$\begin{aligned} \mu * \varphi_\sigma(y) &= \frac{1}{(2\pi\sigma^2)^{d/2}} \int_{\mathbb{R}^d} e^{-|x-y|^2/(2\sigma^2)} d\mu(x) \\ &\geq \frac{1}{(2\pi\sigma^2)^{d/2}} e^{-\mathbb{E}[|y-X|^2/(2\sigma^2)]}, \end{aligned}$$

where the second step uses Jensen's inequality. The desired conclusion follows because  $\mathbb{E}[|y-X|^2] = |y|^2 + \mathbb{E}[|X|^2] - 2\langle y, \mathbb{E}[X] \rangle$  and  $X$  has mean zero.

For a related lower bound, we will apply Theorem 5.24 of (Dolbeault et al., 2009) with the choice of  $\phi(\rho, w) = |w|^p$  to see that  $W_p(\mu_0, \mu_1) \geq C^{-1} \|\mu_0 - \mu_1\|_{\dot{H}^{-1,p}(\gamma)}$  under the same conditions as Lemma 5 but where  $C$  is now an upper bound on the densities. To start, we compute

$$\begin{aligned} \frac{\mu * \varphi_\sigma(y)}{\varphi_{\sqrt{2}\sigma}(y)} &= 2^{d/2} \int_{\mathbb{R}^d} e^{-\frac{|y-x|^2}{2\sigma^2} + \frac{|y|^2}{4\sigma^2}} d\mu(x) \\ &= 2^{d/2} \int_{\mathbb{R}^d} e^{-\frac{|y-2x|^2}{4\sigma^2} + \frac{|x|^2}{2\sigma^2}} d\mu(x) \\ &\leq 2^{d/2} \mathbb{E} [e^{|X|^2/(2\sigma^2)}], \end{aligned}$$

where  $X \sim \mu$ . Hence,

$$\begin{aligned} W_p^{(\sigma)}(\mu_0, \mu_1) &\geq 2^{-d/2} \\ &\left( \mathbb{E} \left[ e^{|X_0|^2/(2\sigma^2)} \right] \wedge \mathbb{E} \left[ e^{|X_1|^2/(2\sigma^2)} \right] \right)^{-1} \\ &\|(\mu_0 - \mu_1) * \mathcal{N}_\sigma\|_{\dot{H}^{-1,p}(\mathcal{N}_{\sqrt{2}\sigma})}, \end{aligned}$$

where  $X_0 \sim \mu_0$  and  $X_1 \sim \mu_1$ . This bound is only meaningful when  $\mu_0$  and  $\mu_1$  are sufficiently sub-Gaussian.  $\square$

### A.1.6. Proof of Proposition 3

For (i), we observe that if  $\mu \neq \nu$ , then the two measures must share a continuity set  $A$  such that  $\mu(A) \neq \nu(A)$ . We can assume without loss of generality that  $A$  does not contain the origin and that  $(\mu - \nu)(A) > 0$ . Then, for any  $C > 0$ , there exists sufficiently small  $\sigma$  such that

$$\begin{aligned} d_p^{(\sigma)}(\mu, \nu) &= \sup_{f: \|\nabla f\|_{L^q(\mathcal{N}_\sigma)} \leq 1} (\mu * \mathcal{N}_\sigma - \nu * \mathcal{N}_\sigma)(f) \\ &\geq (\mu * \mathcal{N}_\sigma - \nu * \mathcal{N}_\sigma)(C\mathbf{1}_A) \\ &= C(\mu * \mathcal{N}_\sigma - \nu * \mathcal{N}_\sigma)(A) \\ &\geq \frac{C}{2}(\mu - \nu)(A). \end{aligned}$$

By taking  $C$  arbitrarily large, we see that  $d_p^{(\sigma)}(\mu, \nu) = \infty$ , establishing (i). For (ii), we employ Theorem 4 and observe that

$$\kappa^{(\sigma)}(x, y) = \langle x, y \rangle + \frac{1}{4\sigma^2} \langle x, y \rangle^2 + O(\sigma^{-4}).$$

As  $\sigma \rightarrow \infty$ , we obtain the pointwise limit kernel  $\kappa^{(\infty)} = \langle x, y \rangle$ , which induces the distance given in (ii). Swapping the limit and the expectation in (5) is justified by the Dominated Convergence Theorem given that  $\mu$  and  $\nu$  are sub-Gaussian.  $\square$

## A.2. Proofs for Section 4

### A.2.1. Proof of Theorem 2

The argument relies on Proposition 7.10 from (Villani, 2003), which is restated next.

**Lemma 6** (Proposition 7.10 in (Villani, 2003)). *For any  $1 \leq p < \infty$ , we have*

$$W_p(\mu, \nu) \leq 2^{\frac{p-1}{p}} \left( \int_{\mathbb{R}^d} |x|^p d|\mu - \nu|(x) \right)^{1/p}. \quad (6)$$

This bound follows by coupling  $\mu$  and  $\nu$  via the maximal TV-coupling and evaluating the resulting transportation cost.

Invoking the lemma and Jensen's inequality, we have

$$\begin{aligned} &\mathbb{E} \left[ W_p^{(\sigma)}(\hat{\mu}_n, \mu) \right] \\ &\leq 2^{\frac{p-1}{p}} \left( \int_{\mathbb{R}^d} |x|^p \mathbb{E} \left[ |\hat{\mu}_n * \varphi_\sigma(x) - \mu * \varphi_\sigma(x)| \right] dx \right)^{1/p} \\ &\leq 2^{\frac{p-1}{p}} n^{-\frac{1}{2p}} \left( \int_{\mathbb{R}^d} |x|^p \sqrt{\text{Var}[\varphi_\sigma(x - X)]} dx \right)^{1/p}, \end{aligned}$$

where the last inequality follows because  $\mathbb{E}[\varphi_\sigma(x - X)] = \mu * \varphi_\sigma(x)$  for all  $x \in \mathbb{R}^d$ . Furthermore,

$$\begin{aligned} \text{Var}[\varphi_\sigma(x - X)] &\leq \mathbb{E}[\varphi_\sigma(x - X)^2] \\ &= \frac{1}{(2\pi\sigma^2)^d} \int_{\mathbb{R}^d} e^{-\frac{|x-y|^2}{\sigma^2}} d\mu(y) \\ &= \frac{1}{(2\pi\sigma^2)^d} \left( \int_{|y| \leq \frac{|x|}{2}} + \int_{|y| > \frac{|x|}{2}} \right) e^{-\frac{|x-y|^2}{\sigma^2}} d\mu(y) \\ &\leq \frac{1}{(2\pi\sigma^2)^d} \left( \int_{|y| \leq \frac{|x|}{2}} e^{-\frac{|x-y|^2}{\sigma^2}} d\mu(y) + \mathbb{P} \left( |X| > \frac{|x|}{2} \right) \right). \end{aligned}$$

If  $|y| \leq |x|/2$ , then  $|x - y|^2 \geq |x|^2/4$ , which yields

$$\sqrt{\text{Var}(\varphi_\sigma(x - X))} \leq \frac{e^{-\frac{|x|^2}{8\sigma^2}} + \sqrt{\mathbb{P} \left( |X| > \frac{|x|}{2} \right)}}{(2\pi\sigma^2)^{d/2}}.$$

Direct calculations show that

$$\int_{\mathbb{R}^d} |x|^p e^{-\frac{|x|^2}{8\sigma^2}} dx = \frac{8^{\frac{d+p}{2}} \sigma^{d+p} \pi^{d/2} \Gamma((d+p)/2)}{\Gamma(d/2)}$$

and

$$\begin{aligned} &\int_{\mathbb{R}^d} |x|^p \sqrt{\mathbb{P}(|X| > |x|/2)} dx \\ &= \frac{2^{d+p+1} \pi^{d/2}}{\Gamma(d/2)} \int_0^\infty r^{d+p-1} \sqrt{\mathbb{P}(|X| > r)} dr. \end{aligned}$$

Hence  $\mathbb{E} \left[ W_p^{(\sigma)}(\hat{\mu}_n, \mu) \right] = O(n^{-1/(2p)})$  if Condition (2) holds. The last assertion follows from Markov's inequality.

To specify the exact constant, we combine the above bounds and simplify to obtain

$$\begin{aligned} \mathbb{E} \left[ W_p^{(\sigma)}(\hat{\mu}_n, \mu) \right] &\leq 2^{1-1/p} n^{-1/2p} \\ &\left( \frac{2^{d+3p/2} \sigma^p \Gamma((d+p)/2)}{\Gamma(d/2)} + \frac{2^{d/2+p+1} I}{\Gamma(d/2) \sigma^d} \right)^{1/p}, \end{aligned}$$

where  $I$  is the integral from Condition (2). By the subadditivity of  $t \mapsto t^{1/p}$  and properties of the gamma function, we bound the RHS above by

$$8n^{-1/2p} \left( 2^{d/p} \sigma \sqrt{d/2 + p + 1} + \frac{2^{d/(2p)} I^{1/p}}{\Gamma(d/2)^{1/p} \sigma^{d/p}} \right).$$

If  $\mu$  is  $\beta$ -sub-Gaussian, then  $\mathbb{P}(|X| > r) \leq 2^{d/2} e^{-\frac{r^2}{4\beta^2}}$  and we can bound

$$\begin{aligned} I &= \int_0^\infty r^{d+p-1} \sqrt{\mathbb{P}(|X| > r)} dr \\ &\leq 2^{d/4} \int_0^\infty r^{d+p-1} e^{-r^2/(4\beta^2)} dr \\ &= 2^{d/4-1} (2\beta)^{d+p} \Gamma((d+p)/2) \\ &= 2^{5d/4+p-1} \beta^{d+p} \Gamma((d+p)/2). \end{aligned}$$

Plugging this into the previous bound, using properties of the gamma function, and simplifying, we obtain

$$\begin{aligned} \mathbb{E} \left[ W_p^{(\sigma)}(\hat{\mu}_n, \mu) \right] &\leq 8n^{-1/2p} \\ &\left( 2^{d/p} \sigma \sqrt{d+p} + 2^{7d/(4p)} \beta^{d/p+1} \sqrt{d+p} \sigma^{-d/p} \right) \\ &\leq 8 \cdot 4^{d/p} \sqrt{d+p} \left[ \sigma + \beta \left( \frac{\beta}{\sigma} \right)^{d/p} \right] \cdot n^{-1/(2p)}. \end{aligned}$$

□

### A.2.2. Proof of Theorem 3

For  $p \geq 1$ , a probability measure  $\gamma \in \mathcal{P}$  is said to satisfy the  $p$ -Poincaré inequality if there exists a finite constant  $D$  such that

$$\|f - \gamma(f)\|_{L^p(\gamma)} \leq D \|\nabla f\|_{L^p(\gamma; \mathbb{R}^d)}, \quad \forall f \in C_0^\infty. \quad (7)$$

The smallest constant satisfying the above is denoted by  $D_p(\gamma)$ . We note in particular that  $\mathcal{N}_\sigma$  satisfies a  $p$ -Poincaré inequality for all  $p \geq 1$  (see, e.g., (Boucheron et al., 2013) and Theorem 2.4 of (Milman, 2009)).

Let  $\partial_j = \partial/\partial x_j$ . For any multi-index  $k = (k_1, \dots, k_d) \in \mathbb{N}_0^d$ , define the differential operator

$$\partial^k = \partial_1^{k_1} \dots \partial_d^{k_d},$$

and let  $\bar{k} = \sum_{j=1}^d k_j$ . We start by bounding the derivatives of centered functions with bounded homogeneous Sobolev norm after Gaussian smoothing.

**Lemma 7.** Fix  $\eta > 0$ . Pick any  $f \in C_0^\infty$  such that  $\|f\|_{\dot{H}^{1,q}(\mathcal{N}_\sigma)} \leq 1$ , and let  $f_\sigma = f * \varphi_\sigma - \mathcal{N}_\sigma(f)$ . Then for any multi-index  $k = (k_1, \dots, k_d) \in \mathbb{N}_0^d$ ,

$$|\partial^k f_\sigma(x)| \lesssim (D_q(\mathcal{N}_\sigma) \vee \sigma^{-\bar{k}+1}) \exp\left(\frac{(p-1)(1+\eta)|x|^2}{2\sigma^2}\right)$$

up to constants independent of  $f$ ,  $x$ , and  $\sigma$ .

*Proof of Lemma 7.* Observe that

$$\begin{aligned} f_\sigma(x) &= \int \varphi_\sigma(x-y) f(y) dy \\ &= \int \frac{\varphi_\sigma(x-y)}{\varphi_\sigma(y)} f(y) \varphi_\sigma(y) dy. \end{aligned}$$

Applying Hölder's inequality, we have

$$|f_\sigma(x)| \leq \left[ \int \frac{\varphi_\sigma^p(x-y)}{\varphi_\sigma^{p-1}(y)} dy \right]^{1/p} \|f\|_{L^q(\mathcal{N}_\sigma)}.$$

Here, since  $\|\nabla f\|_{L^q(\mathcal{N}_\sigma; \mathbb{R}^d)} = \|f\|_{\dot{H}^{1,q}(\mathcal{N}_\sigma)} \leq 1$ , we have

$$\|f\|_{L^q(\mathcal{N}_\sigma)} \leq D_q(\mathcal{N}_\sigma) \|\nabla f\|_{L^q(\mathcal{N}_\sigma; \mathbb{R}^d)} \leq D_q(\mathcal{N}_\sigma).$$

Observe that

$$\begin{aligned} &\int \frac{\varphi_\sigma^p(x-y)}{\varphi_\sigma^{p-1}(y)} dy \\ &= \frac{1}{(2\pi\sigma^2)^{d/2}} \int \exp\left[-\frac{p|x-y|^2 - (p-1)|y|^2}{2\sigma^2}\right] dy \\ &= e^{-p|x|^2/(2\sigma^2)} \int e^{p\langle x, y \rangle/\sigma^2} \varphi_\sigma(y) dy \\ &= \exp\left(\frac{p(p-1)|x|^2}{2\sigma^2}\right). \end{aligned}$$

This yields that

$$|f_\sigma(x)| \leq D_q(\mathcal{N}_\sigma) \exp\left(\frac{(p-1)|x|^2}{2\sigma^2}\right),$$

establishing the claim when  $\bar{k} = 0$ .

Next, we note that

$$\begin{aligned} \nabla f_\sigma(x) &= \int [\nabla_x \varphi_\sigma(x-y)] f(y) dy \\ &= - \int [\nabla_y \varphi_\sigma(x-y)] f(y) dy \\ &= \int \varphi_\sigma(x-y) \nabla_y f(y) dy. \end{aligned}$$

Since  $\|\nabla f\|_{L^q(\mathcal{N}_\sigma; \mathbb{R}^d)} \leq 1$ , we can apply the preceding argument to conclude that

$$|\nabla f_\sigma(x)| \leq \exp\left(\frac{(p-1)|x|^2}{2\sigma^2}\right).$$

Finally, we extend to arbitrary derivatives, observing that for any  $i = 1, \dots, d$  and  $k \in \mathbb{N}_0^d$ ,

$$\begin{aligned} &\partial^k \partial_i f_\sigma(x) \\ &= \int [\partial_i f(y)] \varphi_\sigma(x-y) \prod_{j=1}^d (-1)^{k_j} \sigma^{-k_j} \text{He}_{k_j}\left(\frac{x_j - y_j}{\sigma}\right) dy. \end{aligned} \quad (8)$$

Here, we use that

$$\partial^k \varphi_\sigma(z) = \varphi_\sigma(z) \left[ \prod_{j=1}^d (-1)^{k_j} \sigma^{-k_j} \text{He}_{k_j}(z_j/\sigma) \right],$$

where  $\text{He}_n$  is the Hermite polynomial of degree  $n$  defined by

$$\text{He}_n(x) = (-1)^n e^{x^2/2} \frac{d^n}{dx^n} e^{-x^2/2}.$$

Return to (8). Pick any  $\eta > 0$ . Since the product term in (8) can be bounded (up to constants) by  $1 + |x - y|^{\bar{k}}$ , we have

$$|\partial^k \partial_j f_\sigma(x)| \lesssim \sigma^{-\bar{k}} \int |\partial_j f(y)| \varphi_{\sigma(1+\eta)^{-1/2}}(x-y) dy.$$

up to a constant independent of  $f, x,$  and  $\sigma$ . The desired bound follows by the same argument we applied to control  $|\nabla f_\sigma(x)|$ .

Now, to be more precise with constants, we note that since  $D_2(\mathcal{N}_\sigma) = \sigma^2$  and  $\mathcal{N}_\sigma$  is log-concave, we have by Theorem 2.4 of (Milman, 2009) that  $D_q(\mathcal{N}_\sigma) \leq C\sigma^2$  for all  $q \in [1, \infty]$ , for some absolute constant  $C > 0$ . Next, we recall the explicit formula

$$\text{He}_n(x) = n! \sum_{m=0}^{\lfloor n/2 \rfloor} \frac{(-1)^m}{m!(n-2m)!} \frac{x^{n-2m}}{2^m}.$$

Using  $|x|^m \leq 1 + |x|^n$  for  $m = 1, \dots, n$ , we (quite loosely) bound

$$|\text{He}_n(x)| \leq n!(1 + |x|^n) \sum_{m=0}^{\lfloor n/2 \rfloor} \frac{1}{m!(n-2m)! 2^m}.$$

This summand is unimodal and attains its maximum at  $m = \lfloor \frac{n}{2} - \frac{\sqrt{n+2}}{2} \rfloor$ . Using this and Stirling's approximation, we find

$$\begin{aligned} |\text{He}_n(x)| &\leq \frac{n!(1 + |x|^n)(n+4)}{\Gamma(\frac{n}{2} - \frac{\sqrt{n+2}}{2}) \Gamma(\sqrt{n+2} - 1) 2^{\frac{n}{2} - \frac{\sqrt{n+2}}{2}}} \\ &\leq (1 + |x|^n)(cn)^{n/2}, \end{aligned}$$

for some absolute constant  $c > 0$ . Now, the product term in (8) is bounded in absolute value by

$$\sigma^{-\bar{k}} \prod_{j=1}^d (1 + |z_j|)^n (ck_j)^{k_j/2} \leq \sigma^{-\bar{k}} (c\bar{k})^{\bar{k}/2} (1 + |z|)^{\bar{k}}.$$

With a bit of calculus, we compute

$$\begin{aligned} |\partial^k \partial_j f_\sigma(x)| &\leq (c'\bar{k})^{\bar{k}} \sigma^{-\bar{k}} (1 + \eta)^{d/2} \\ &\int |\partial_j f(y)| \varphi_{\sigma(1+\eta)^{-1/2}}(x-y) dy, \end{aligned}$$

for some second constant  $c' > 0$  and any  $\eta > 0$ , so long as  $\sigma \leq 1$ , say. Applying the same argument used to control

$|\nabla f_\sigma(x)|$ , we bound

$$\begin{aligned} &\int \frac{\varphi_{\sigma(1+\eta)^{-1/2}}(x-y)^p}{\varphi_\sigma(y)^{p-1}} dy \leq \\ &(1 + p\eta)^d e^{-\frac{p(1+\eta)|x|^2}{2\sigma^2}} \int e^{-\frac{p(1+\eta)\langle x, y \rangle}{\sigma^2}} \varphi_{\sigma(1+\eta p)^{-1/2}}(y) dy \\ &= (1 + p\eta)^d e^{-\frac{p(1+\eta)|x|^2}{2\sigma^2} + \frac{p^2(1+\eta)^2|x|^2}{(1+\eta p)\sigma^2}} \\ &= (1 + p\eta)^d e^{-\frac{p(1+\eta)|x|^2}{2\sigma^2} + \frac{p^2(1+\eta)^2|x|^2}{(1+\eta p)\sigma^2}}, \end{aligned}$$

which yields

$$\begin{aligned} |\partial^k \partial_j f_\sigma(x)| &\leq (c'\bar{k})^{\bar{k}} \eta^{-\bar{k}/2} \sigma^{-\bar{k}} (1 + \eta)^{3d/2} \\ &\exp\left(\frac{|x|^2}{2\sigma^2} \left(\frac{p(1+\eta)^2}{(1+\eta p)} - (1+\eta)\right)\right) \\ &\leq (c'\bar{k})^{\bar{k}} \eta^{-\bar{k}/2} \sigma^{-\bar{k}} (1 + \eta)^{3d/2} \\ &\exp\left(\frac{(p-1)|x|^2}{2\sigma^2} (1 + \eta p + \eta)\right). \end{aligned}$$

Substituting  $\eta$  with  $\eta/(p+1)$  and combining with the previous results, we establish the bound

$$\begin{aligned} |\partial^k f_\sigma(x)| &\leq \\ &(C')^d \bar{k}^{\bar{k}-1} p^{3d/2} \sigma^{1-\bar{k}} \exp\left(\frac{(p-1)|x|^2}{\sigma^2}\right) \end{aligned}$$

for some absolute constant  $C' > 0$  and any  $k \in \mathbb{N}_0^d$ , when  $\sigma \leq 1$ .  $\square$

Next, we present a useful lemma concerning empirical approximation for IPMs whose function classes are sufficiently well-behaved.

**Lemma 8.** *Let  $\mathcal{F} \subset C^\alpha(\mathbb{R}^d)$  be a function class where  $\alpha$  is a positive integer with  $\alpha > d/2$ , and let  $\{\mathcal{X}_j\}_{j=1}^\infty$  be a cover of  $\mathbb{R}^d$  consisting of nonempty bounded convex sets with bounded diameter. Set  $M_j = \sup_{f \in \mathcal{F}} \|f\|_{C^\alpha(\mathcal{X}_j)}$  with  $\|f\|_{C^\alpha(\mathcal{X}_j)} = \max_{\bar{k} \leq \alpha} \sup_{x \in \text{int}(\mathcal{X}_j)} |\partial^{\bar{k}} f(x)|$ . If  $\sum_{j=1}^\infty M_j \mu(\mathcal{X}_j)^{1/2} < \infty$ , then  $\mathcal{F}$  is  $\mu$ -Donsker and  $\mathbb{E}[\|\hat{\mu}_n - \mu\|_{\infty, \mathcal{F}}] \lesssim n^{-1/2} \sum_{j=1}^\infty M_j \mu(\mathcal{X}_j)^{1/2}$  up to constants that depend only on  $d, \alpha$ , and  $\sup_j \text{diam}(\mathcal{X}_j)$ .*

*Proof of Lemma 8.* The lemma follows from Theorem 1.1 in (var der Vaart, 1996). Let  $I_1 = \mathcal{X}_1$  and  $I_j = \mathcal{X}_j \setminus \bigcup_{k=1}^{j-1} \mathcal{X}_k$  for  $j = 2, 3, \dots$ . The collection  $\{I_j\}$  forms a partition of  $\mathbb{R}^d$ . Define  $\mathcal{F}_{\mathcal{X}_j} = \{f \mathbb{1}_{\mathcal{X}_j} : f \in \mathcal{F}\}$  and  $\mathcal{F}_{I_j} = \{f \mathbb{1}_{I_j} : f \in \mathcal{F}\}$ . Let  $F = \sum_j M_j \mathbb{1}_{I_j}$ , which gives an envelope for  $\mathcal{F}$ . Observe that

$$\mu(F^2) = \sum_j M_j^2 \mu(I_j) \leq \sum_j M_j^2 \mu(\mathcal{X}_j) < \infty,$$

which also ensures that  $\mathcal{F} \subset L^2(\mu)$ .



In view of the discussion before Corollary 2.1 in (van der Vaart, 1996), we see that each  $\mathcal{F}_{\mathcal{X}_j}$  is  $\mu$ -Donsker (which implies that  $\mathcal{F}_{I_j}$  is  $\mu$ -Donsker as  $\mathcal{F}_{I_j}$  can be viewed as a subset of  $\mathcal{F}_{\mathcal{X}_j}$ ) and

$$\begin{aligned} \mathbb{E}[\|\sqrt{n}(\hat{\mu}_n - \mu)\|_{\infty, \mathcal{F}_{I_j}}] &\leq \mathbb{E}[\|\sqrt{n}(\hat{\mu}_n - \mu)\|_{\infty, \mathcal{F}_{\mathcal{X}_j}}] \\ &\lesssim M_j \mu(\mathcal{X}_j)^{1/2} \end{aligned}$$

up to constants that depend only on  $d, \alpha$ , and  $\sup_j \text{diam}(\mathcal{X}_j)$ . The RHS is summable over  $j$  so that by Theorem 1.1 in (van der Vaart, 1996),  $\mathcal{F}$  is  $\mu$ -Donsker. The bound on  $\mathbb{E}[\|\hat{\mu}_n - \mu\|_{\infty, \mathcal{F}}]$  follows by summing up bounds on  $\mathbb{E}[\|\hat{\mu}_n - \mu\|_{\infty, \mathcal{F}_{I_j}}]$ .  $\square$

We are now in position to prove Theorem 3.

*Proof of Theorem 3.* Observe that

$$((\hat{\mu}_n - \mu) * \mathcal{N}_\sigma)(f) = (\hat{\mu}_n - \mu)(f * \varphi_\sigma). \quad (9)$$

and consider the function classes

$$\mathcal{F} = \{f \in C_0^\infty : \|f\|_{\dot{H}^{1,q}(\mathcal{N}_\sigma)} \leq 1\} \quad (10)$$

$$\mathcal{F} * \varphi_\sigma = \{f * \varphi_\sigma : f \in \mathcal{F}\}. \quad (11)$$

We apply Lemma 8 to show that the function class  $\mathcal{F} * \varphi_\sigma$  is  $\mu$ -Donsker, implying the limit described in the theorem statement. Since for any constant  $a \in \mathbb{R}$  and any function  $f \in \mathcal{F}$ ,  $(\hat{\mu}_n - \mu)(f * \varphi_\sigma) = (\hat{\mu}_n - \mu)((f - a) * \varphi_\sigma)$ , we only have to verify the conditions of Lemma 8 for  $\mathcal{F} * \varphi_\sigma$  with  $\mathcal{F}$  replaced by  $\{f - \mathcal{N}_\sigma(f) : f \in C_0^\infty, \|f\|_{\dot{H}^{1,q}(\mathcal{N}_\sigma)} \leq 1\}$ .

We first construct a cover  $\{\mathcal{X}_j\}_{j=1}^\infty$  as follows. Let  $B_r = B(0, r)$ . For  $\delta > 0$  fixed and  $r = 2, 3, \dots$ , let  $\{x_1^{(r)}, \dots, x_{N_r}^{(r)}\}$  be a minimal  $\delta$ -net of  $B_{r\delta} \setminus B_{(r-1)\delta}$ . Set  $x_1^{(1)} = 0$  with  $N_1 = 1$ . To bound  $N_r$ , we show that the covering number  $N(B_{r\delta} \setminus B_{(r-1)\delta}, |\cdot|, \epsilon)$ , defined as the size of the smallest  $\epsilon$ -cover of  $B_{r\delta} \setminus B_{(r-1)\delta}$ , satisfies

$$N(B_{r\delta} \setminus B_{(r-1)\delta}, |\cdot|, \epsilon) \leq \left(\frac{2r\delta}{\epsilon} + 1\right)^d - \left(\frac{2(r-1)\delta}{\epsilon} - 1\right)^d \quad (12)$$

for  $0 < \epsilon \leq 2(r-1)\delta$ , according to a volumetric argument. Specifically, let  $\{x_1, \dots, x_N\}$  be a maximal  $\epsilon$ -separated subset of  $B_{r\delta} \setminus B_{(r-1)\delta}$ . By maximality,  $\{x_1, \dots, x_N\}$  is an  $\epsilon$ -net of  $B_{r\delta} \setminus B_{(r-1)\delta}$ . By construction,

$$\bigcup_{j=1}^N B(x_j, \epsilon/2) \subset B_{r\delta + \epsilon/2} \setminus B_{(r-1)\delta - \epsilon/2}$$

and the balls of the left-hand side (LHS) are disjoint. Comparing volumes, we have

$$N(\epsilon/2)^d \leq (r\delta + \epsilon/2)^d - ((r-1)\delta - \epsilon/2)^d. \quad \square$$

This yields the bound on the covering number.

Given (12), we obtain  $N_r \leq (2r+1)^d - (2r-3)^d = O(r^{d-1})$ . Set

$$\mathcal{X}_j = B(x_j^{(r)}, \delta), \quad j = \sum_{k=1}^{r-1} N_k + 1, \dots, \sum_{k=1}^r N_k.$$

By construction,  $\{\mathcal{X}_j\}_{j=1}^\infty$  forms a cover of  $\mathbb{R}^d$  with diameter  $2\delta$ . Set  $\alpha = \lfloor d/2 \rfloor + 1$  and  $M_j = \sup_{f \in \mathcal{F} : \mathcal{N}_\sigma(f)=0} \|f * \varphi_\sigma\|_{C^\alpha(\mathcal{X}_j)}$ . Fix any  $\eta > 0$ . By Lemma 7,

$$\begin{aligned} &\max_{\sum_{k=1}^{r-1} N_k + 1 \leq j \leq \sum_{k=1}^r N_k} M_j \\ &\lesssim \sigma^{-\lfloor d/2 \rfloor} \exp\left(\frac{(1+\eta)(p-1)r^2\delta^2}{2\sigma^2}\right) \end{aligned}$$

up to constants independent of  $r$  and  $\sigma$ . Hence, in view of Lemma 8, the  $\mu$ -Donsker property of  $\mathcal{F} * \varphi_\sigma$  holds if

$$\sum_{r=1}^\infty r^{d-1} \exp\left(\frac{(1+\eta)(p-1)r^2\delta^2}{2\sigma^2}\right) \sqrt{\mathbb{P}(|X| > (r-1)\delta)}$$

is finite. By Riemann approximation, the sum above can be bounded by  $\delta^{-d-1}$  times

$$\int_1^\infty t^{d-1} \exp\left(\frac{(1+\eta)(p-1)t^2}{2\sigma^2}\right) \sqrt{\mathbb{P}(|X| > t - 2\delta)} dt$$

which is finite under our assumption by choosing  $\eta$  and  $\delta$  sufficiently small, and absorbing  $t^{d-1}$  by the exponential term.

For more precise constants, we assume that  $\mu$  is contained in a ball of radius  $R$  centered at the origin. Then, using the constants from the proof of Lemma 7 with  $\eta = 1$  and taking  $\delta \leq R/2$ , we find that the  $\sqrt{n} \mathbb{E} [d_p^{(\sigma)}(\hat{\mu}_n, \mu)]$  is bounded by

$$\begin{aligned} &(C')^d d^{d/2} p^{3d/2} \sigma^{1-\bar{k}} 4^{d-1} \exp\left(\frac{4(p-1)R^2}{\sigma^2}\right) \\ &\leq (cdp^3 \sigma^{-1})^{d/2} e^{pR^2 \sigma^{-2}}, \end{aligned}$$

for some absolute constant  $c > 0$ , so long as  $\sigma \leq 1$ , say.  $\square$

### A.2.3. Proof of Corollary 2

The moment convergence of  $\sqrt{n} d_p^{(\sigma)}(\hat{\mu}_n, \mu)$  follows from Lemma 2.3.11 in (van der Vaart & Wellner, 1996). Finiteness of  $\mathbb{E}[\|G\|_{\dot{H}^{-1,p}(\mathcal{N}_\sigma)}]$  follows from Proposition A.2.3 in (van der Vaart & Wellner, 1996). The second result follows from Theorem 1 after centering  $\mu$  and  $\hat{\mu}_n$  by the mean of  $\mu$ . Plugging in the constant from the previous proof, we find that

$$\sqrt{n} \mathbb{E} [W_p^{(\sigma)}(\hat{\mu}_n, \mu)] \leq (cdp^3 \sigma^{-1})^{d/2} e^{pR^2 \sigma^{-2}}$$

when  $\mu$  is contained in a ball of radius  $R$  and  $\sigma \leq 1$ , for some (different) constant  $c > 0$ .  $\square$

#### A.2.4. Proof of Proposition 4

Without loss of generality, we may assume that  $X$  has mean zero. If  $X$  is  $\beta$ -sub-Gaussian, then

$$\mathbb{E}[e^{\eta|X|^2}] \leq \underbrace{(1 - 2\beta^2\eta)^{-d/2}}_{=C_\eta} \quad \text{if } \eta < 1/(2\beta^2).$$

By Markov's inequality, we have

$$\mathbb{P}(|X| > r) \leq C_\eta e^{-\eta r^2}.$$

Thus,

$$\int_0^\infty e^{\frac{\theta r^2}{2\sigma^2}} \sqrt{\mathbb{P}(|X| > r)} dr \leq C_\eta^{1/2} \int_0^\infty e^{-(\eta - \frac{\theta}{\sigma^2})\frac{r^2}{2}} dr.$$

The right hand side is finite if and only if  $\eta > \frac{\theta}{\sigma^2}$ . Such  $\eta$  exists if and only if

$$\frac{1}{2\beta^2} > \frac{\theta}{\sigma^2}, \quad \text{i.e., } \beta < \frac{\sigma}{\sqrt{2\theta}}.$$

Sine  $\theta > p - 1$  is arbitrary, we obtain the desired conclusion.  $\square$

#### A.2.5. Proof of Proposition 5

Given the comparison result of Theorem 1 and our characterization of  $\mathbb{E}[d_p^{(\sigma)}(\hat{\mu}_n, \mu)]$  in the proof of Theorem 3, it suffices to prove

$$\Pr\left(d_p^{(\sigma)}(\hat{\mu}_n, \mu) \geq \mathbb{E}[d_p^{(\sigma)}(\hat{\mu}_n, \mu)] + t\right) \leq e^{c'nt^2} \quad (13)$$

for some constant  $c' > 0$  independent of  $n$  and  $t$ . We apply Corollary 1 of (Goldfeld & Greenwald, 2020), where the 1-Lipschitz function class  $\text{Lip}_1$  is substituted with  $\mathcal{F}_0 = \{f - \mathcal{N}_\sigma(f) : f \in C_0^\infty, \|f\|_{\dot{H}^{1,q}(\mathcal{N}_\sigma)} \leq 1\}$ . The desired conclusion follows according to the same argument, using McDiarmid's inequality, upon observing that for  $x, x' \in \text{supp}(\mu)$ ,

$$\begin{aligned} & \sup_{f \in \mathcal{F}_0} (f * \varphi_\sigma)(x) - (f * \varphi_\sigma)(x') \\ & \leq 2 \sup_{f \in \mathcal{F}_0, y \in \text{supp}(\mu)} (f * \varphi_\sigma)(y) \\ & \leq 2D_q(\mathcal{N}_\sigma) \exp\left(\frac{(p-1)R^2}{2\sigma^2}\right), \end{aligned}$$

where the final inequality uses Lemma 7.  $\square$

### A.3. Proofs for Section 5

First, we comment on a subtle detail regarding the construction of the homogeneous Sobolev space.

**Remark 4.** For  $\gamma \in \mathcal{P}$  dominating the Lebesgue measure and satisfying the  $p$ -Poincaré inequality, the homogeneous Sobolev space  $\dot{H}^{1,p}(\gamma)$  can be constructed as a function space over  $\mathbb{R}^d$  that contains  $\dot{C}_0^\infty$  as a dense subset in an explicit manner (without relying on the completion, which is an abstract metric-topological operation). See Appendix A.6 for details of the construction.

Next, we observe that the inner product on  $\dot{H}_0^{1,2}(\mathcal{N}_\sigma) * \varphi_\sigma$  is well-defined. That is, for  $f, g \in \dot{H}_0^{1,2}(\mathcal{N}_\sigma)$ , we show that  $f * \varphi_\sigma = g * \varphi_\sigma$  if and only if  $f = g$  almost everywhere. This requires an application of Wiener's Tauberian theorem for  $L^2(\mathbb{R}^d)$ , with a proof provided for completeness.

**Theorem 5** (Wiener's Tauberian theorem for  $L^2$ ). *If the Fourier transform  $F[f]$  of  $f \in L^2(\mathbb{R}^d)$  never vanishes, then the span of the set of translates  $\{f_a : f_a(x) = f(a+x), a \in \mathbb{R}^d\}$  is dense in  $L^2(\mathbb{R}^d)$ .*

*Proof.* Suppose that  $g \in L^2(\mathbb{R}^d)$  is orthogonal to all translates of  $f$ . Then, because  $F$  is a unitary operator on  $L^2(\mathbb{R}^d)$ ,

$$\begin{aligned} 0 &= \int_{\mathbb{R}^d} g(x) f_a(x) dx \\ &= \int_{\mathbb{R}^d} F[g](p) F[f_a](p) dp \\ &= \int_{\mathbb{R}^d} e^{iap} F[g](p) F[f](p) dp \end{aligned}$$

for all  $a \in \mathbb{R}^d$ . Equivalently, we have

$$F[F[g] \cdot F[f]](-a) = 0$$

for all  $a \in \mathbb{R}^d$ . That is,  $F[F[g] \cdot F[f]] = 0$ . Since  $F$  is injective, and  $F[f]$  never vanishes, we have  $g = 0$ , implying the desired density result.  $\square$

**Lemma 9** (Well-definedness of inner product). *For  $f \in \dot{H}_0^{1,2}(\mathcal{N}_\sigma)$ ,  $f * \varphi_\sigma = 0$  if and only if  $f = 0$  almost everywhere.*

*Proof.* By the previous remark, we can consider  $f$  as an element of  $L^2(\mathcal{N}_\sigma)$ . The "if" direction is trivial. For the other direction, recall that  $f$  can be realized as the limit in  $L^2(\mathcal{N}_\sigma)$  of a sequence  $\{f_n\}_{n \in \mathbb{N}}$  of simple functions with compact support. If  $f * \varphi_\sigma = 0$ , we have for any  $y \in \mathbb{R}^d$  that

$$\begin{aligned} & \left| \int_{\mathbb{R}^d} f_n(x) \varphi_\sigma(y-x) dx \right| \\ &= \left| \int_{\mathbb{R}^d} (f_n - f)(x) \varphi_\sigma(y-x) dx \right| \\ &\leq \|f - f_n\|_{L^2(\mathcal{N}_\sigma)} \int_{\mathbb{R}^d} \frac{\varphi_\sigma(y-x)^2}{\varphi_\sigma(x)} dx \rightarrow 0 \end{aligned}$$

as  $n \rightarrow \infty$ . Because the Fourier transform of  $\varphi_\sigma$  never vanishes, Theorem 5 implies that the span of the functions  $\varphi_\sigma(y - \cdot)$  is dense in  $L^2(\mathbb{R}^d)$ ; thus,  $\langle f_n, g \rangle_{L^2(\mathbb{R}^d)} \rightarrow 0$  for any  $g \in L^2(\mathbb{R}^d)$ . That is, the sequence  $f_n$  converges weakly to 0 in  $L^2(\mathbb{R}^d)$ . Hence,  $f_n$  must converge weakly to 0 in  $L^2(\mathcal{N}_\sigma)$  as well (since the density  $\varphi_\sigma$  is bounded). Seeing as  $f$  is the ordinary limit of  $f_n$  in  $L^2(\mathcal{N}_\sigma)$ , it must therefore coincide with the weak limit of 0.  $\square$

Now, since functions which are equal almost everywhere have the same convolution with  $\varphi_\sigma$ , this implies that  $\dot{H}_0^{1,2}(\mathcal{N}_\sigma) * \varphi_\sigma$  is realizable as a Hilbert space of functions (not equivalence classes of functions), the most basic requirement for the RKHS property.

Next, we prove a lemma which allows us to concentrate on  $\sigma = 1$  without loss of generality.

**Lemma 10** (Unit smoothing parameter). *For  $\mu, \nu \in \mathcal{P}_p$ , let  $X \sim \mu$  and  $Y \sim \nu$ . Then,*

$$d_p^{(\sigma)}(\mu, \nu) = \sigma d_p^{(1)}(\mu', \nu'),$$

where  $\mu'$  and  $\nu'$  are the distributions of  $X/\sigma$  and  $Y/\sigma$ , respectively.

*Proof of Lemma 10.* First, define the isometric isomorphism  $T : \dot{H}^{1,q}(\mathcal{N}_\sigma) \rightarrow \dot{H}^{1,q}(\mathcal{N}_1)$  by  $(Tf)(x) = \sigma^{-1}f(\sigma x)$ . We verify

$$\begin{aligned} \int_{\mathbb{R}^d} |\nabla_x (Tf)(x)|^q d\mathcal{N}_1(x) &= \int_{\mathbb{R}^d} |\sigma^{-1} \nabla_x f(\sigma x)|^q \varphi_1(x) dx \\ &= \int_{\mathbb{R}^d} |\nabla f(\sigma x)|^q \varphi_1(x) dx \\ &= \int_{\mathbb{R}^d} |\nabla f(u)|^q d\mathcal{N}_\sigma(u). \end{aligned}$$

Taking independent  $X \sim \mu, Y \sim \nu$ , and  $Z \sim \mathcal{N}_1$  and noting that  $f(x) = \sigma Tf(x/\sigma)$ , we have

$$\begin{aligned} (\mu - \nu)(f * \varphi_\sigma) &= \mathbb{E}[f(X + \sigma Z) - f(Y + \sigma Z)] \\ &= \sigma \cdot \mathbb{E}[Tf(X/\sigma + Z) - Tf(Y/\sigma + Z)] \\ &= \sigma \cdot (\mu' - \nu')(Tf * \varphi_1), \end{aligned}$$

where  $\mu'$  and  $\nu'$  are the distributions of  $X/\sigma$  and  $Y/\sigma$ , respectively. Thus,

$$\begin{aligned} d_p^{(\sigma)}(\mu, \nu) &= \sup_{\substack{f \in \dot{H}^{1,q}(\mathcal{N}_\sigma) \\ \|f\|_{\dot{H}^{1,q}(\mathcal{N}_\sigma)} \leq 1}} (\mu - \nu)(f * \varphi_\sigma) \\ &= \sigma \sup_{\substack{Tf \in \dot{H}^{1,q}(\mathcal{N}_1) \\ \|Tf\|_{\dot{H}^{1,q}(\mathcal{N}_1)} \leq 1}} (\mu' - \nu')(Tf * \varphi_1) \\ &= \sigma d_p^{(1)}(\mu', \nu'). \end{aligned}$$

This completes the proof.  $\square$

Next, we identify an orthonormal basis of  $\dot{H}_0^{1,2}(\mathcal{N}_1) * \varphi_1$ . We first prove that Hermite polynomials form an orthonormal basis of  $\dot{H}_0^{1,2}(\mathcal{N}_1)$ , and then translate this to an orthonormal basis of  $\dot{H}_0^{1,2}(\mathcal{N}_1) * \varphi_1$ . Here, for  $k \in \mathbb{N}_0^d$ , we write  $x^k := \prod_{i=1}^d x_i$  and  $\bar{k} := \sum_{i=1}^d k_i$ .

**Lemma 11** (Orthonormal basis of  $\dot{H}_0^{1,2}(\mathcal{N}_1) * \varphi_1$ ). *The monomials  $\phi_k(x) = (\bar{k} \prod_{i=1}^d k_i)^{-1/2} x^k$ ,  $0 \neq k \in \mathbb{N}_0^d$ , comprise an orthonormal basis of  $\dot{H}_0^{1,2}(\mathcal{N}_1) * \varphi_1$ .*

*Proof of Lemma 11.* Recall that the Hermite polynomials defined as

$$\text{He}_n(x) = (-1)^n e^{x^2/2} \frac{d^n}{dx^n} e^{-x^2/2}$$

satisfy  $\text{He}'_n(x) = n \text{He}_{n-1}(x)$  and  $\int \text{He}_n \text{He}_m d\mathcal{N}_1 = n! \delta_{n,m}$  (Bogachev, 1998). They admit a natural multivariate extension

$$\text{He}_k(x) = \prod_{i=1}^d \text{He}_{k_i}(x_i), \quad k \in \mathbb{N}_0^d,$$

which satisfies

$$\begin{aligned} \langle \text{He}_k, \text{He}_{k'} \rangle_{\dot{H}^{1,2}(\mathcal{N}_1)} &= \int \langle \nabla \text{He}_k, \nabla \text{He}_{k'} \rangle d\mathcal{N}_1 \\ &= \sum_{i=1}^d \int \frac{\partial \text{He}_k}{\partial x_i} \frac{\partial \text{He}_{k'}}{\partial x_i} d\mathcal{N}_1 \\ &= \delta_{k,k'} \bar{k} \prod_{i=1}^d k_i!. \end{aligned}$$

Thus, the normalized polynomials  $\widetilde{\text{He}}_k := (\bar{k} \prod k_i!)^{-1/2} \text{He}_k$ ,  $0 \neq k \in \mathbb{N}_0^d$ , form an orthonormal set, and it is easy to check that they span the space of  $d$ -variate polynomials  $Q$  with  $\mathcal{N}_1(Q) = 0$ . By Proposition 1.3 of (Schmuland, 1992), polynomials are dense in the inhomogeneous Gaussian Sobolev space  $H^{1,2}(\mathcal{N}_1)$ , and hence  $\dot{H}^{1,2}(\mathcal{N}_1)$ , so it follows that the  $\widetilde{\text{He}}_k$  polynomials form an orthonormal basis for  $\dot{H}_0^{1,2}(\mathcal{N}_1)$ .

Next, we observe that, in one dimension,  $(\text{He}_n * \varphi_1)(x) = x^n$ . To see this, we use the Rodrigues formula for the Hermite polynomials (Rasala, 1981), which states that  $\text{He}_n(x) = e^{-D^2/2}[x^n]$ . Here,  $D$  is the differentiation operator and  $\exp$  is defined on operators via its formal power series (working with polynomials, there are no issues of convergence). We can express convolution with a standard Gaussian in a similar way, with  $f * \varphi_1 = e^{D^2/2}f$  (where it suffices to consider only  $f$  that are polynomials) (Bilodeau, 1962). Together, these reveal that  $(\text{He}_n * \varphi_1)(x) = x^n$ . Thus, for  $0 \neq k \in \mathbb{N}_0^d$ , we obtain

$$(\widetilde{\text{He}}_k * \varphi_1)(x) = \left( \bar{k} \prod k_i! \right)^{-1/2} x^k =: \phi_k(x).$$



Since the  $\widetilde{\text{He}}_k$  polynomials form an orthonormal basis for  $\dot{H}_0^{1,2}(\mathcal{N}_1)$ , the  $\phi_k$  monomials form an orthonormal basis for  $\dot{H}_0^{1,2}(\mathcal{N}_1) * \varphi_1$ , as claimed.  $\square$

Now, the theorem follows via routine calculations.

### A.3.1. Proof of Theorem 4

By Lemma 7, we have that for any  $f \in \dot{H}_0^{1,2}(\mathcal{N}_\sigma)$ ,

$$\begin{aligned} |(f * \varphi_\sigma)(x)| &\leq D_2(\mathcal{N}_\sigma) e^{|x|^2/(2\sigma^2)} \|\nabla f\|_{L^2(\mathcal{N}_\sigma)} \\ &= e^{|x|^2/(2\sigma^2)} \|f * \varphi_\sigma\|_{\dot{H}^{1,2}(\mathcal{N}_\sigma) * \varphi_\sigma}, \end{aligned}$$

so pointwise evaluation at  $x$  is a bounded linear operator on  $\dot{H}_0^{1,2}(\mathcal{N}_\sigma) * \varphi_\sigma$  for each  $x \in \mathbb{R}^d$ . This implies that  $\dot{H}_0^{1,2}(\mathcal{N}_\sigma) * \varphi_\sigma$  is an RKHS over  $\mathbb{R}^d$ . For  $\sigma = 1$ , we can compute the reproducing kernel from the orthonormal basis above (see Theorem 4.20 of (Steinwart & Christmann, 2008)) as

$$\begin{aligned} \kappa^{(1)}(x, y) &= \sum_{0 \neq k \in \mathbb{N}_0^d} \phi_k(x) \phi_k(y) \\ &= \sum_{0 \neq k \in \mathbb{N}_0^d} \left( |k| \prod k_i! \right)^{-1} x^k y^k \\ &= \sum_{n=1}^{\infty} \frac{1}{n \cdot n!} \sum_{|k|=n} \frac{n!}{\prod k_i!} x^k y^k \\ &= \sum_{n=1}^{\infty} \frac{1}{n \cdot n!} \langle x, y \rangle^n = -\text{Ein}(-\langle x, y \rangle). \end{aligned}$$

We note that  $\kappa^{(1)}$  is positive semi-definite by this construction. The MMD formulation (5) follows because

$$\begin{aligned} d_2^{(1)}(\mu, \nu) &= \sup \left\{ \mu(f * \varphi_1) - \nu(f * \varphi_1) : \right. \\ &\quad \left. f \in \dot{H}_0^{1,2}(\mathcal{N}_1), \|f\|_{\dot{H}^{1,2}(\mathcal{N}_1)} \leq 1 \right\} \\ &= \sup \left\{ \mu(g) - \nu(g) : \right. \\ &\quad \left. g \in \dot{H}_0^{1,2}(\mathcal{N}_1) * \varphi_1, \|g\|_{\dot{H}^{1,2}(\mathcal{N}_1) * \varphi_1} \leq 1 \right\} \\ &= \text{MMD}_{\dot{H}_0^{1,2}(\mathcal{N}_1) * \varphi_1}(\mu, \nu) \end{aligned}$$

and the RHS of (5) is the standard kernel formulation of an MMD (Gretton et al., 2012). The extension to general  $\sigma$  follows from Lemma 10 and the uniqueness of the reproducing kernel.  $\square$

## A.4. Proofs for Section 6

### A.4.1. Proof of Proposition 7

We first consider the size control. Suppose that  $\mu = \nu$ . Without loss of generality, we may assume that  $\mu$  is not a

point mass. To handle shifts of distributions, for any  $a \in \mathbb{R}^d$ , we represent

$$\begin{aligned} &\sqrt{\frac{mn}{N}} d_p^{(\sigma)}(\hat{\mu}_m * \delta_{-a}, \hat{\nu}_n * \delta_{-a}) \\ &= \left\| \sqrt{\frac{n}{N}} \sqrt{m}(\hat{\mu}_m - \mu)(f(\cdot - a) * \varphi_\sigma) \right. \\ &\quad \left. - \sqrt{\frac{m}{N}} \sqrt{n}(\hat{\nu}_n - \mu)(f(\cdot - a) * \varphi_\sigma) \right\|_{\infty, \mathcal{F}}, \end{aligned}$$

where the function class  $\mathcal{F} = \{f \in C_0^\infty : \|f\|_{\dot{H}^{1,q}(\mathcal{N}_\sigma)} \leq 1\}$  is the one from the proof of Theorem 3. Consider another function class

$$\mathcal{F}_{\text{shift}} = \{f(\cdot - a) : f \in C_0^\infty, \|f\|_{\dot{H}^{1,q}(\mathcal{N}_\sigma)} \leq 1, |a| \leq C\}$$

for some large enough constant  $C < \infty$  such that the mean  $a_\mu$  of  $\mu$  satisfies  $|a_\mu| < C$ . It is not difficult to see from the proof of Theorem 3 that the function class  $\mathcal{F}_{\text{shift}} * \varphi_\sigma$  is  $\mu$ -Donsker, which implies that (cf. Theorem 1.5.7 in (van der Vaart & Wellner, 1996))

$$\limsup_{m \rightarrow \infty} \mathbb{P} \left( \sup_{\substack{f \in C_0^\infty \\ \|f\|_{\dot{H}^{1,q}(\mathcal{N}_\sigma)} \leq 1 \\ |a-b| < \delta}} \left| \sqrt{m}(\hat{\mu}_m - \mu)((f(\cdot - a) - f(\cdot - b)) * \varphi_\sigma) \right| > \epsilon \right) \rightarrow 0$$

as  $\delta \rightarrow 0$ , for all  $\epsilon > 0$ . Here we used the fact that  $|a-b| \rightarrow 0$  implies that  $\text{Var}((f(X-a) - f(X-b)) * \varphi_\sigma) \rightarrow 0$ . Since  $\bar{X}_m \rightarrow a_\mu$  a.s. by the law of large numbers, we have

$$\sup_{\substack{f \in C_0^\infty \\ \|f\|_{\dot{H}^{1,q}(\mathcal{N}_\sigma)} \leq 1}} \left| \sqrt{m}(\hat{\mu}_m - \mu)((f(\cdot - \bar{X}_m) - f(\cdot - a_\mu)) * \varphi_\sigma) \right| \xrightarrow{\mathbb{P}} 0.$$

A similar result holds for  $\hat{\nu}_n$ . Now, by Theorem 3, we have

$$\begin{aligned} W_{m,n} &\leq p \sqrt{\frac{mn}{N}} \\ &\min \left\{ e^{\text{tr} \hat{\Sigma}_X / (2q\sigma^2)} d_p^{(\sigma)}(\hat{\mu}_m * \delta_{-\bar{X}_m}, \hat{\nu}_n * \delta_{-\bar{X}_m}), \right. \\ &\quad \left. e^{\text{tr} \hat{\Sigma}_Y / (2q\sigma^2)} d_p^{(\sigma)}(\hat{\mu}_m * \delta_{-\bar{Y}_n}, \hat{\nu}_n * \delta_{-\bar{Y}_n}) \right\}, \end{aligned} \tag{14}$$

In view of this inequality, together with the fact that  $\hat{\Sigma}_X \rightarrow \Sigma_\mu$  and  $\hat{\Sigma}_Y \rightarrow \Sigma_\mu$  a.s., where  $\Sigma_\mu$  is the covariance matrix of  $\mu$ , we conclude that  $W_{m,n}$  is at most

$$p e^{\text{tr} \Sigma_\mu / (2q\sigma^2)} \sqrt{\frac{mn}{N}} d_p^{(\sigma)}(\hat{\mu}_m * \delta_{-a_\mu}, \hat{\nu}_n * \delta_{-a_\mu}) + o_{\mathbb{P}}(1).$$

Now, the function class  $\mathcal{F} * \varphi_\sigma$  is Donsker w.r.t.  $\mu * \delta_{-a_\mu}$ , so that from p. 361 of (van der Vaart & Wellner, 1996), we have

$$\sqrt{\frac{mn}{N}} d_p^{(\sigma)}(\hat{\mu}_m * \delta_{-a_\mu}, \hat{\nu}_n * \delta_{-a_\mu}) \xrightarrow{d} \|G\|_{\mathcal{F}, \infty},$$

where  $G$  is the Gaussian process that appears in Theorem 3 with  $\mu$  replaced by  $\mu * \delta_{-a_\mu}$ .

It is easy to show that the distribution function of  $\|G\|_{\dot{H}^{-1,p}(\mathcal{N}_\sigma)}$  is continuous (cf. the proof of Lemma 3 in (Goldfeld et al., 2020a)), so long as  $\mu$  is not a point mass (in which case the proposition is trivially true). To show that the test has asymptotic level  $\alpha$ , it then suffices to show that (cf. Lemma 23.3 in (van der Vaart, 1998))

$$\mathbb{P}^B \left( \sqrt{\frac{mn}{N}} d_p^{(\sigma)}(\hat{\mu}_m^B * \delta_{-\bar{Z}_N}, \hat{\nu}_n^B * \delta_{-\bar{Z}_N}) \leq t \right) \xrightarrow{\mathbb{P}} \mathbb{P} \left( \|G\|_{\dot{H}^{-1,p}(\mathcal{N}_\sigma)} \leq t \right), \quad \forall t \geq 0. \quad (15)$$

Observe that

$$\begin{aligned} & \sqrt{\frac{mn}{N}} d_p^{(\sigma)}(\hat{\mu}_m^B * \delta_{-\bar{Z}_N}, \hat{\nu}_n^B * \delta_{-\bar{Z}_N}) \\ &= \left\| \sqrt{\frac{n}{N}} \sqrt{m} (\hat{\mu}_m^B - \hat{\gamma}_N)(f(\cdot - \bar{Z}_N) * \varphi_\sigma) \right. \\ & \quad \left. - \sqrt{\frac{m}{N}} \sqrt{n} (\hat{\nu}_n^B - \hat{\gamma}_N)(f(\cdot - \bar{Z}_N) * \varphi_\sigma) \right\|_{\infty, \mathcal{F}}. \end{aligned}$$

Since the function class  $\mathcal{F}_{\text{shift}} * \varphi_\sigma$  is  $\mu$ -Donsker, by Theorem 3.6.1 in (van der Vaart & Wellner, 1996), the bootstrap process  $\sqrt{m}(\hat{\mu}_m^B - \hat{\gamma}_N)$  indexed by  $\mathcal{F}_{\text{shift}} * \varphi_\sigma$  converges in distribution in  $\ell^\infty(\mathcal{F}_{\text{shift}} * \varphi_\sigma)$  unconditionally, which implies that

$$\limsup_{m,n \rightarrow \infty} \mathbb{P} \left( \sup_{\substack{f \in C_0^\infty \\ \|f\|_{\dot{H}^{1,q}(\mathcal{N}_\sigma)} \leq 1 \\ |a-b| < \delta}} \left| \sqrt{m}(\hat{\mu}_m^B - \hat{\gamma}_N)((f(\cdot - a) - f(\cdot - b)) * \varphi_\sigma) \right| > \epsilon \right) \rightarrow 0$$

as  $\delta \rightarrow 0$ , for all  $\epsilon > 0$ . Since  $\bar{Z}_N \rightarrow a_\mu$  a.s. by the law of large numbers, we have

$$\sup_{f \in C_0^\infty, \|f\|_{\dot{H}^{1,q}(\mathcal{N}_\sigma)} \leq 1} \left| \sqrt{m}(\hat{\mu}_m^B - \hat{\gamma}_N)((f(\cdot - \bar{Z}_N) - f(\cdot - a_\mu)) * \varphi_\sigma) \right| \xrightarrow{\mathbb{P}} 0.$$

An analogous result holds for  $\hat{\nu}_n^B$ . Thus, we have

$$\begin{aligned} & \sqrt{\frac{mn}{N}} d_p^{(\sigma)}(\hat{\mu}_m^B * \delta_{-\bar{Z}_N}, \hat{\nu}_n^B * \delta_{-\bar{Z}_N}) \\ &= \sqrt{\frac{mn}{N}} d_p^{(\sigma)}(\hat{\mu}_m^B * \delta_{-a_\mu}, \hat{\nu}_n^B * \delta_{-a_\mu}) + o_{\mathbb{P}}(1). \end{aligned}$$

The desired conclusion (15) follows from Theorem 3.7.6 in (van der Vaart & Wellner, 1996) combined with the fact that the function class  $\mathcal{F} * \varphi_\sigma$  is  $\mu * \delta_{-a_\mu}$ -Donsker.

To show asymptotic consistency, suppose that  $\mu \neq \nu$  and note that the preceding argument and Theorem 3.7.6 in (van der Vaart & Wellner, 1996) imply that

$$\mathbb{P}^B(W_{m,n}^B \leq t) \xrightarrow{\mathbb{P}} \mathbb{P} \left( p e^{\text{tr} \Sigma_\gamma / (2q\sigma^2)} \|G_\gamma\|_{\dot{H}^{-1,p}(\mathcal{N}_\sigma)} \leq t \right)$$

for all  $t \geq 0$ , where  $\Sigma_\gamma$  is the covariance matrix of the measure  $\gamma = \tau\mu + (1-\tau)\nu$  and  $G_\gamma$  is the Gaussian process from Theorem 3 with  $\mu$  replaced by  $\gamma * \delta_{-a_\gamma}$  ( $a_\gamma$  is the mean vector of  $\gamma$ ). Furthermore, it is not difficult to see that  $W_{m,n} \xrightarrow{\mathbb{P}} \infty$  under the alternative, which implies that  $\mathbb{P}(W_{m,n} > w_{m,n}^B(1-\alpha)) \rightarrow 1$  whenever  $\mu \neq \nu$ .  $\square$

Propositions 7, 8, and 9 follow from essentially similar proofs to those in (Goldfeld et al., 2020a), which build on (Bernton et al., 2019) and (Pollard, 1980), with arbitrary  $p \geq 1$  instead of the  $p = 1$  considered therein (indeed, the needed results from (Villani, 2008) hold for all  $1 \leq p < \infty$ ), so we omit their proofs for brevity.

#### A.4.2. Proof of Corollary 3

First, we state a simple lemma to bound generalization error of minimum distance estimation w.r.t. an IPM in terms of the empirical approximation error.

**Lemma 12** (Generalization error for GANs). *For an IPM  $d$  and an estimator  $\hat{\theta}_n \in \Theta$  with  $d(\hat{\mu}_n, \nu_{\hat{\theta}_n}) \leq \inf_{\theta \in \Theta} d(\hat{\mu}_n, \nu_\theta) + \epsilon$ , we have*

$$d(\mu, \nu_{\hat{\theta}_n}) - \inf_{\theta \in \Theta} d(\mu, \nu_\theta) \leq 2d(\mu, \hat{\mu}_n) + \epsilon.$$

This is a consequence of the triangle inequality, see (Zhang et al., 2018) for example. Hence, our conclusion follows upon noting that

$$\begin{aligned} \mathbb{P} \left( 2W_p^{(\sigma)}(\mu, \hat{\mu}_n) > t \right) &\leq \mathbb{P} \left( d_p^{(\sigma)}(\mu, \hat{\mu}_n) > Ct \right) \\ &\leq \exp \left( -n(Ct - C'n^{-1/2})^2 \right) \\ &\leq C_1 \exp(-C_2 nt^2), \end{aligned}$$

where constants  $C, C', C_1, C_2$  are independent of  $n$  and  $t$ . Here, we have combined the concentration result (13), the comparison from Theorem 1, and the fast rate from Corollary 2.  $\square$

## A.5. Additional Details for Experiments

In Figure 5, we present additional S-MWE experiments for a single Gaussian parameterized by mean and variance, demonstrating similar limiting behavior to the mixture results provided in the main text.

We note that experiments for Figures 1, 3, and 5 were performed on a Dell OptiPlex 7050 PC with 32GB RAM and an 8 core 2.80GHz Intel Core i7 CPU, running in approximately 3 hours, 30 minutes, and 30 minutes, respectively. Computations for Figure 3 were performed on a cluster instance with 14 vCPUs and 112 GB RAM over several hours. Those for Figure 4 were performed on a cluster machine with 14 vCPUs, 60 GB RAM, and a NVIDIA Tesla V100 over nearly 12 hours (hence the restriction to low dimensions).

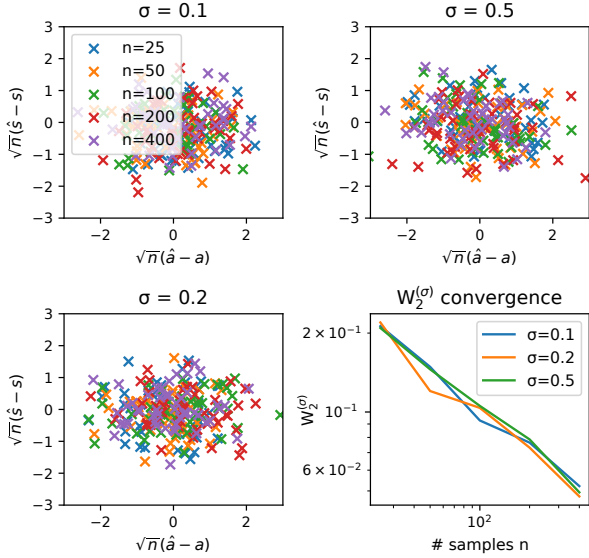

Figure 5. One-dimensional limiting behavior of M-SWE estimates for the mean and standard deviation parameters of  $\mu = \mathcal{N}(a, s)$  with  $a = 0$  and  $s = 1$ . Also shown is a log-log plot of  $W_2^{(\sigma)}$  convergence in  $n$ .

Finally, we describe how the upper bound on  $W_2^{(\sigma)}$  was computed for the rightmost plot of Figure 1.

### A.5.1. Upper Bound on $\mathbb{E} [W_2^{(\sigma)}(\hat{\mu}_n, \mu)]$ using $d_2^{(\sigma)}$

By Theorem 4, we have

$$\begin{aligned} d_2^{(\sigma)}(\hat{\mu}_n, \mu)^2 &= \mathbb{E} [\kappa^{(\sigma)}(X, X')] + \frac{1}{n^2} \sum_{i,j=1}^n \kappa^{(\sigma)}(X_i, X_j) \\ &\quad - \frac{2}{n} \sum_{i=1}^n \mathbb{E} [\kappa^{(\sigma)}(X, X_i)], \end{aligned}$$

where  $X, X' \sim \mu$  are independent. Taking expectations, we obtain

$$\begin{aligned} \mathbb{E} [d_2^{(\sigma)}(\hat{\mu}_n, \mu)^2] &= \mathbb{E} [\kappa^{(\sigma)}(X, X')] + \frac{1}{n} \mathbb{E} [\kappa^{(\sigma)}(X, X)] \\ &\quad + \left(1 - \frac{1}{n}\right) \mathbb{E} [\kappa^{(\sigma)}(X, X')] - \frac{2}{n} \sum_{i=1}^n \mathbb{E} [\kappa^{(\sigma)}(X, X_i)] \\ &= \frac{1}{n} \left( \mathbb{E} [\kappa^{(\sigma)}(X, X)] - \mathbb{E} [\kappa^{(\sigma)}(X, X')] \right). \end{aligned}$$

Combining this with Theorem 1, we reach the upper bound

$$\begin{aligned} \mathbb{E} [W_2^{(\sigma)}(\hat{\mu}_n, \mu)] &\leq 2e^{\mathbb{E}[|X|^2]/(4\sigma^2)} \\ &\quad \left( \mathbb{E} [\kappa^{(\sigma)}(X, X)] - \mathbb{E} [\kappa^{(\sigma)}(X, X')] \right)^{1/2} n^{-1/2}. \end{aligned}$$

For Figure 1, we estimate the kernel expectations via Monte Carlo integration with 1,000,000 samples. The kernel itself is computed via standard series-based methods for exponential integrals.

## A.6. Explicit Construction of the Homogeneous Sobolev space

Let  $\gamma \in \mathcal{P}$  be dominating the Lebesgue measure and satisfying the  $p$ -Poincaré inequality. Consider the homogeneous Sobolev space  $\dot{H}^{1,p}(\gamma)$ , which is constructed in Section 2 as the completion of  $C_0^\infty$  w.r.t.  $\|\cdot\|_{\dot{H}^{1,p}(\gamma)}$ . As such, it is not clear that the obtained space is a function space over  $\mathbb{R}^d$ . To show this is nevertheless the case, we present an explicit construction of  $\dot{H}^{1,p}(\gamma)$  that does not rely on the completion.

Let  $\mathcal{C} = \{f \in \dot{C}_0^\infty : \gamma(f) = 0\}$ . Then,  $\|\cdot\|_{\dot{H}^{1,p}(\gamma)}$  is a proper norm on  $\mathcal{C}$ , and the map  $\iota : f \mapsto \nabla f$  is an isometry from  $(\mathcal{C}, \|\cdot\|_{\dot{H}^{1,p}(\gamma)})$  into  $(L^p(\gamma; \mathbb{R}^d), \|\cdot\|_{L^p(\gamma; \mathbb{R}^d)})$ . Let  $V$  be the closure of  $\iota\mathcal{C}$  in  $L^p(\gamma; \mathbb{R}^d)$  under  $\|\cdot\|_{L^p(\gamma; \mathbb{R}^d)}$ . The inverse map  $\iota^{-1} : \iota\mathcal{C} \rightarrow \mathcal{C}$  can be extended to  $V$ . Indeed, for any  $g \in V$ , choose  $f_n \in \mathcal{C}$  such that  $\|\nabla f_n - g\|_{L^p(\gamma; \mathbb{R}^d)} \rightarrow 0$ . Since  $\nabla f_n$  is Cauchy in  $L^p(\gamma; \mathbb{R}^d)$ ,  $f_n$  is Cauchy in  $L^p(\gamma)$  by the  $p$ -Poincaré inequality, so  $\|f_n - f\|_{L^p(\gamma)} \rightarrow 0$  for some  $f \in L^p(\gamma)$ . Set  $\iota^{-1}g = f$  and extend  $\|\cdot\|_{\dot{H}^{1,p}(\gamma)}$  by  $\|f\|_{\dot{H}^{1,p}(\gamma)} = \lim_{n \rightarrow \infty} \|f_n\|_{\dot{H}^{1,p}(\gamma)}$ . The space  $(\iota^{-1}V, \|\cdot\|_{\dot{H}^{1,p}(\gamma)})$  is a Banach space of functions over  $\mathbb{R}^d$ .

The homogeneous Sobolev space  $\dot{H}^{1,p}(\gamma)$  is now constructed as  $\dot{H}^{1,p}(\gamma) = \{f + a : a \in \mathbb{R}, f \in \iota^{-1}V\}$  with  $\|f + a\|_{\dot{H}^{1,p}(\gamma)} = \|f\|_{\dot{H}^{1,p}(\gamma)}$ .
